# Supplementary material for: Copper sulfate and cupric citrate supplementation improves growth performance, nutrient utilization, antioxidant capacity and intestinal microbiota of broilers
Source: Research Square preprint supplement (doi:10.21203/rs.3.rs-1638131/v1), 2022-05-16
Supplement: Supplementary file 1 [file a19edd294a93e0cae43a198d.xlsx]

## Sheet: Growth performance
	W1	W21	W42	1-21天耗料	22-42	42天耗料	ADG1-21	ADFI1-21	FG1-21	ADG22-42	ADFI22-42	FG22-42	ADG42	ADFI42	FG42
Control	40	768	2485	12275	40224	52499	34.6667	48.7103	1.40511	81.7619	159.619	1.95224	58.2143	104.165	1.78933
Control	40	822	2546	12832	41895	54727	37.2381	50.9206	1.36743	82.0952	166.25	2.02509	59.6667	108.585	1.81987
Control	40	811	2701	11951	46311	58262	36.7143	47.4246	1.29172	90	183.774	2.04193	63.3571	115.599	1.82456
Control	40	814	2607	12759	44113	56872	36.8571	50.631	1.37371	85.381	175.052	2.05024	61.119	112.841	1.84625
Control	40	794	2668	12379	45564	57943	35.9048	49.123	1.36815	89.2381	180.81	2.02615	62.5714	114.966	1.83736
Control	40	817	2588	12977	40175	53152	37	51.496	1.39178	84.3333	159.425	1.89041	60.6667	105.46	1.73836
CS50	40	824	2655	13070	41798	54868	37.3333	51.8651	1.38924	87.1905	165.865	1.90233	62.2619	108.865	1.7485
CS50	40	767	2627	12006	42463	54469	34.619	47.6429	1.3762	88.5714	168.504	1.90246	61.5952	108.073	1.75457
CS50	40	839	2661	13115	44861	57976	38.0476	52.0437	1.36786	86.7619	178.02	2.05182	62.4048	115.032	1.84332
CS50	40	828	2559	11893	41529	53422	37.5238	47.1944	1.25772	82.4286	164.798	1.99928	59.9762	105.996	1.7673
CS50	40	840	2791	13481	44153	57634	38.0952	53.496	1.40427	92.9048	175.21	1.88591	65.5	114.353	1.74585
CS50	40	763	2496	11016	41549	52565	34.4286	43.7143	1.26971	82.5238	164.877	1.99793	58.4762	104.296	1.78356
CS100	40	852	2688	13100	42374	55474	38.6667	51.9841	1.34442	87.4286	168.151	1.92329	63.0476	110.067	1.74578
CS100	40	812	2739	12159	44720	56879	36.7619	48.25	1.3125	91.7619	177.46	1.93392	64.2619	112.855	1.75618
CS100	40	864	2743	13473	43072	56545	39.2381	53.4643	1.36256	89.4762	170.921	1.91024	64.3571	112.192	1.74328
CS100	40	802	2597	12316	42410	54726	36.2857	48.873	1.34689	85.4762	168.294	1.9689	60.881	108.583	1.78354
CS100	40	864	2535	11819	41616	53435	39.2381	46.9008	1.19529	79.5714	165.143	2.0754	59.4048	106.022	1.78474
CS100	40	863	2749	13511	44410	57921	39.1905	53.6151	1.36806	89.8095	176.23	1.96227	64.5	114.923	1.78175
CC50	40	837	2636	12399	44083	56482	37.9524	49.2024	1.29642	85.6667	174.933	2.04201	61.8095	112.067	1.81311
CC50	40	812	2807	12347	46285	58632	36.7619	48.996	1.33279	95	183.671	1.93338	65.881	116.333	1.76581
CC50	40	819	2638	12384	43366	55750	37.0952	49.1429	1.32478	86.619	172.087	1.98671	61.8571	110.615	1.78823
CC50	40	874	2846	13359	44527	57886	39.7143	53.0119	1.33483	93.9048	176.694	1.88163	66.8095	114.853	1.71911
CC50	40	820	2663	12472	43792	56264	37.1429	49.4921	1.33248	87.7619	173.778	1.9801	62.4524	111.635	1.78752
CC50	40	885	2714	12383	42753	55136	40.2381	49.1389	1.2212	87.0952	169.655	1.94792	63.6667	109.397	1.71827
CC100	40	841	2694	13104	43770	56874	38.1429	52	1.3633	88.2381	173.69	1.96843	63.1905	112.845	1.7858
CC100	40	880	2811	13172	44888	58060	40	52.2698	1.30675	91.9524	178.127	1.93717	65.9762	115.198	1.74606
CC100	40	886	2816	12297	38701	50998	40.2857	48.7976	1.21129	91.9048	153.575	1.67103	66.0952	101.187	1.53092
CC100	40	831	2705	13053	46396	59449	37.6667	51.7976	1.37516	89.2381	184.111	2.06314	63.4524	117.954	1.85894
CC100	40	834	2739	13164	43425	56589	37.8095	52.2381	1.38161	90.7143	172.321	1.89961	64.2619	112.28	1.74722
CC100	40	827	2605	12804	42425	55229	37.4762	50.8095	1.35578	84.6667	168.353	1.98842	61.0714	109.581	1.79431

## Sheet: Nutrient Utilization
	DM	Energy	CP	Ca	P
Control	71.25	72.86	48.4	38.84	24.78
Control	73.9	78.08	50.98	35.39	25.7
Control	74.5	77.58	52.65	40.94	27.64
Control	76.78	72.12	54.31	36.37	26.26
Control	67.73	77.24	47.23	36.34	26.37
Control	75.46	74.17	52.34	40.01	26.24
CS50	71.41	79.62	50.95	40.59	26.96
CS50	77.05	80.23	55.12	40.65	24.01
CS50	71.52	74.73	50.35	38.96	27.21
CS50	73.69	76.07	51.16	35.26	25.81
CS50	75.87	79.87	49.18	37.39	26.54
CS50	73.5	78.81	51.89	37.85	28.38
CS100	79.53	82.33	54.6	36.27	25.47
CS100	73.78	76.44	53.68	40.55	25.03
CS100	73.29	79.01	54.36	37.53	29.7
CS100	72.5	75.52	51.47	39.94	27.76
CS100	78.04	80.67	52.05	39	27.13
CS100	74.57	80.11	53.6	40.44	23.93
CC50	71.91	79.31	50.63	38.52	24.14
CC50	76.98	79.44	51.63	39.97	27.76
CC50	74.01	76.28	51.44	36.59	25.38
CC50	73.71	79.1	52.8	40.87	27.73
CC50	74.2	79.32	53.71	36.51	29.01
CC50	77.15	81.75	55.45	33.47	22.4
CC100	73.05	78.42	54.55	40.67	25.72
CC100	78.95	79	52.37	39.84	27.83
CC100	77.06	83.26	53.91	39.5	24.81
CC100	76.29	77.24	55.09	39.1	26.52
CC100	73.84	80.25	53.69	35.09	28.98
CC100	75.27	81.27	53.85	36.33	27.81

## Sheet: Microflora
	42Ileum		42Cecum
	Lactobacillus	Escherichia coli	Lactobacillus	Escherichia coli
Control	7.61	5.13	8.27	6.87
Control	6.44	4.79	8.62	7.36
Control	6.75	5.37	9.19	7.37
Control	7.75	5.33	8.53	6.65
Control	7.63	5.41	8.1	8.07
Control	7.9	6.3	7.68	7.55
CS50	7.78	4.41	8.29	7.22
CS50	6.92	4.56	7.68	6.64
CS50	6.63	4.91	7.32	6.91
CS50	7.86	4.75	8.27	6.7
CS50	6.49	5.29	8.09	7.28
CS50	6.61	4.4	7.96	6.4
CS100	6.02	5.19	8.26	5.83
CS100	6.86	4.49	6.77	6.47
CS100	5.9	4.31	7.01	5.92
CS100	6.54	4.23	6.63	5.87
CS100	6.75	3.96	7.94	5.26
CS100	6.52	4	7.02	5.8
CC50	7.92	4.37	7.66	5.89
CC50	6.72	4.16	6.99	5.77
CC50	6.2	5.05	6.53	6.82
CC50	7.64	4.21	7.8	5.57
CC50	6.42	5.19	6.75	6.04
CC50	6.65	4.35	7.98	6.44
CC100	7.7	4.19	6.47	5.92
CC100	6.21	3.88	6.36	5.05
CC100	6.13	3.35	7.21	5.5
CC100	5.9	4.27	7.34	5.55
CC100	6.29	4.32	6.49	5.13
CC100	7.05	3.86	7.12	5
CuS
CuM
40
80
平方和
平方和/组数/重复数
SEM

## Sheet: pH
	肌胃	腺胃	十二指肠中部	空肠中段	回肠前段	回肠后端
Control	2.98	3.8	5.91	5.92	6.04	6.97
Control	2.95	3.77	5.74	6.06	6	7.08
Control	3.01	3.84	5.92	6.03	6.16	7.45
Control	3.03	3.89	6.07	6	6.16	7.11
Control	2.95	3.77	5.75	6.15	5.97	6.65
Control	2.82	3.58	5.78	6.02	5.64	7.36
CS50	3.08	3.94	6.13	5.95	6.29	6.72
CS50	2.79	3.58	5.8	5.97	5.61	7.04
CS50	2.92	3.74	6.09	6.26	5.9	7.16
CS50	2.99	3.82	6.03	5.92	6.08	7.01
CS50	3.09	3.96	6.17	5.89	6.33	7.34
CS50	2.68	3.44	5.93	6.36	6.37	7.22
CS100	2.99	3.83	6.05	6.29	6.08	6.73
CS100	2.86	3.65	6.38	5.91	5.77	7.44
CS100	3.11	3.98	6.22	6.05	6.39	6.81
CS100	2.86	3.66	6.28	6.18	5.77	6.98
CS100	2.9	3.72	5.94	6.35	5.86	6.56
CS100	2.77	3.54	6.26	6.29	5.65	7.09
CC50	2.96	3.8	6.21	6.16	6.06	7.38
CC50	3.08	3.94	6.03	5.97	6.31	7.03
CC50	2.98	3.79	6.16	6.05	6.04	7.17
CC50	3.06	3.91	5.93	6.27	6.31	6.91
CC50	2.91	3.71	6.03	6.03	5.89	7.08
CC50	2.95	3.76	6.2	6.3	5.96	7.23
CC100	3.04	3.9	6.27	6.29	6.25	6.9
CC100	2.83	3.65	6.39	6.45	5.75	6.89
CC100	2.91	3.72	6.29	6.23	5.91	7.03
CC100	2.76	3.76	6.01	6.36	5.94	7.09
CC100	3.02	3.81	6.11	6.02	6.07	7.17
CC100	2.95	3.87	6.42	6.33	5.7	6.71

## Sheet: Antioxidant
	CER，U/L	SOD，U/mL
Control	1.8898	89.7954
Control	1.981	93.0776
Control	1.8399	72.9061
Control	2.0103	95.206
Control	1.9805	96.8373
Control	1.8813	96.6808
CS50	2.0465	95.8754
CS50	1.8921	101.028
CS50	2.0131	94.6813
CS50	2.0869	97.6576
CS50	2.1619	100.941
CS50	1.7713	85.7111
CS100	2.0764	97.227
CS100	2.1522	93.2883
CS100	1.9738	93.2171
CS100	2.0144	109.929
CS100	2.0744	97.6164
CS100	2.1545	100.477
CC50	2.0168	95.1687
CC50	2.1442	101.032
CC50	2.1332	100.154
CC50	2.0125	94.5106
CC50	1.992	134.367
CC50	2.0001	94.5058
CC100	2.0701	97.2335
CC100	2.1073	109.035
CC100	2.0578	96.6674
CC100	2.0042	122.027
CC100	2.1842	116.409
CC100	2.1078	98.7921
